# Supplementary material for: Moisturized 2-dimensional halide perovskite generates a power density of 30 mW cm−3
Source: Royal Society of Chemistry journal article supplement (doi:10.1039/d3ee01765f), 2023-01-01
Supplement: d3ee01765f1.pdf [file d3ee01765f1.pdf]

*Electronic Supplementary Information (ESI) for*

## **Moisturized 2-dimensional halide perovskite generates a power density of 30 mW cm<sup>-3</sup>**

Chunqing Ma,<sup>1†</sup> Yeon-Woo Choi,<sup>1†</sup> Donghyeon Kang,<sup>2‡</sup> Bosung Kim,<sup>3</sup> Seung-Gu Choi,<sup>4</sup>

Jin-Wook Lee,<sup>4</sup> Sang-Woo Kim,<sup>3\*</sup> Nam-Gyu Park<sup>1,5\*</sup>

<sup>1</sup>School of Chemical Engineering and Center for Antibonding Regulated Crystals, Sungkyunkwan University, Suwon 16419, Republic of Korea

<sup>2</sup>School of Advanced Materials Science and Engineering, Sungkyunkwan University, Suwon 16419, Republic of Korea

<sup>3</sup>Department of Materials Science and Engineering, Center for Human-oriented Triboelectric Energy Harvesting, Yonsei University, Seoul 03722, Republic of Korea

<sup>4</sup>Department of Nano Engineering and Department of Nano Science and Technology, SKKU Advanced Institute of Nanotechnology (SAINT), Sungkyunkwan University, Suwon 16419, Republic of Korea

<sup>5</sup>SKKU Institute of Energy Science and Technology (SIEST), Sungkyunkwan University, Suwon 16419, Republic of Korea

†These authors contributed equally to the work

\*Corresponding Authors: [kimsw1@yonsei.ac.kr](mailto:kimsw1@yonsei.ac.kr); [npark@skku.edu](mailto:npark@skku.edu)

Supplementary materials include

Figures S1-S18,

Tables S1,

and References.

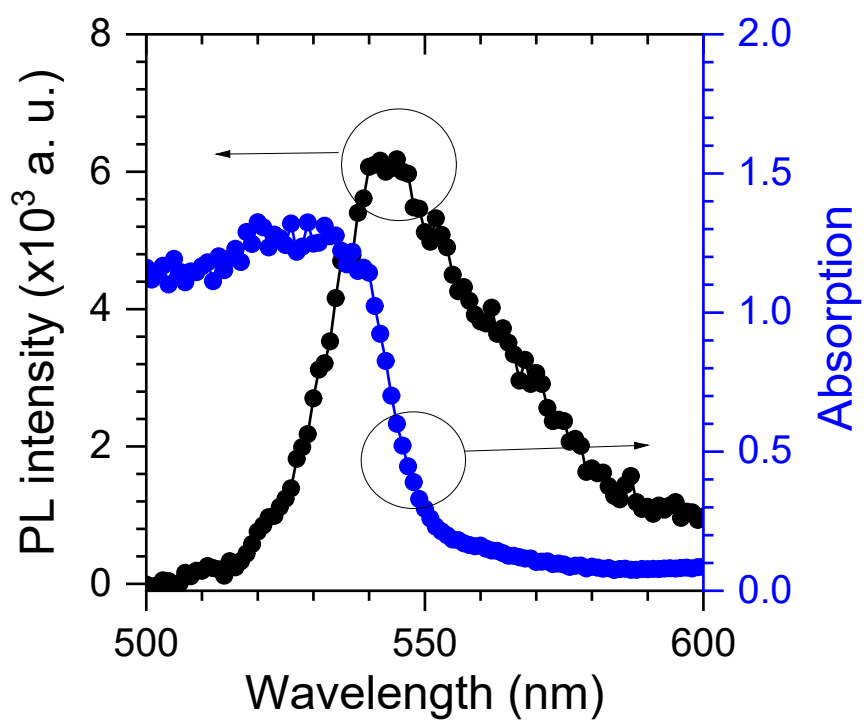

**Fig. S1.** Absorbance and steady-state PL of the 2D perovskite.

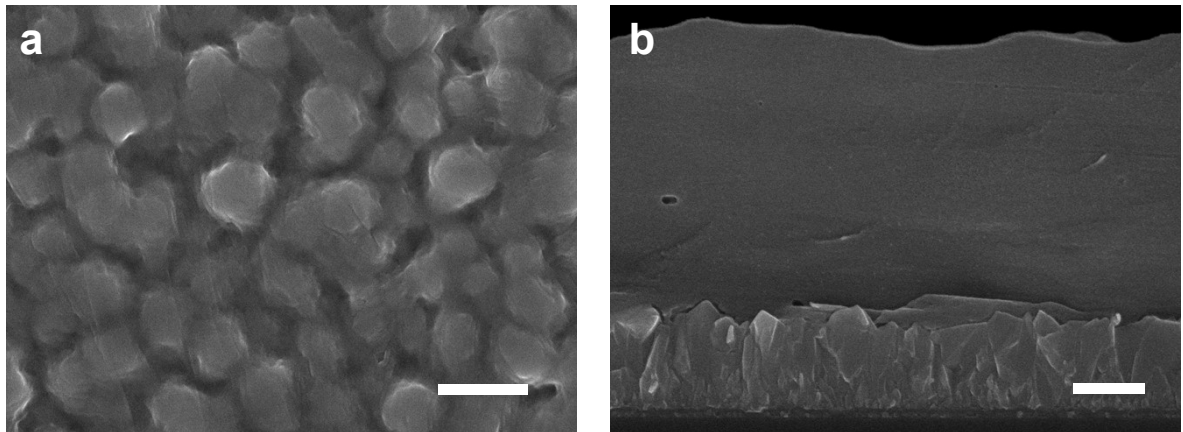

**Fig. S2.** (a) Surface and (b) cross-sectional SEM images of the 2D perovskite thin film. Scale bars are (a) 2  $\mu\text{m}$  and (b) 500 nm.

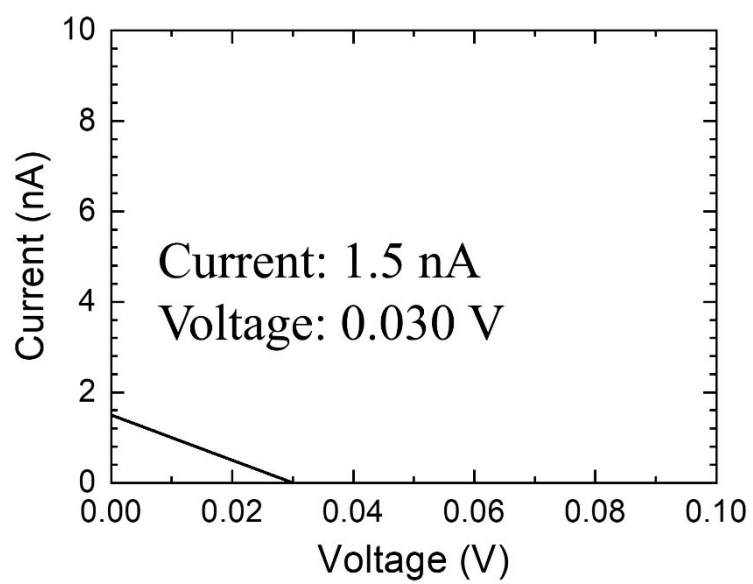

**Fig. S3.** Performance of the ionovoltaic device under 1-sun illumination.

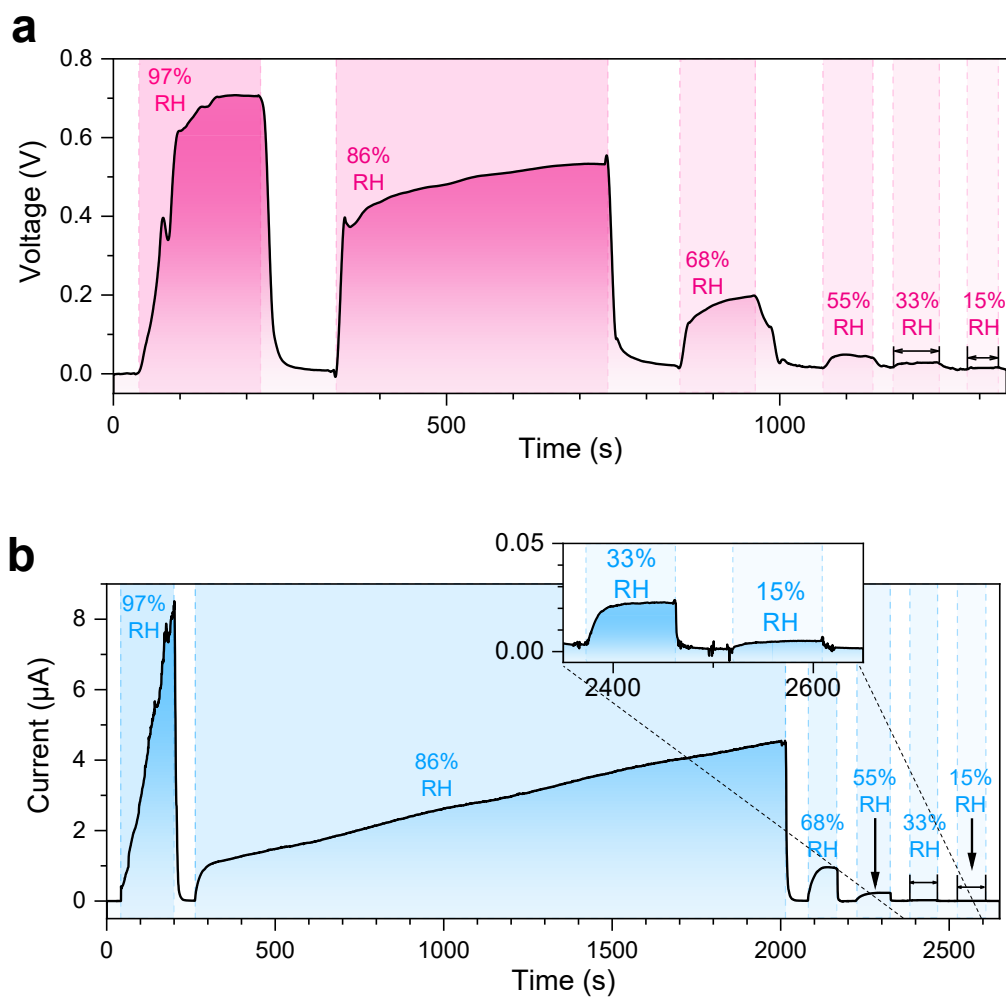

**Fig. S4.** (a) V-t and (b) I-t graph of the device under 15%, 33%, 55%, 68%, 86% and 97% RH exposure at 20 °C. Colored regions are humidity-exposed periods.

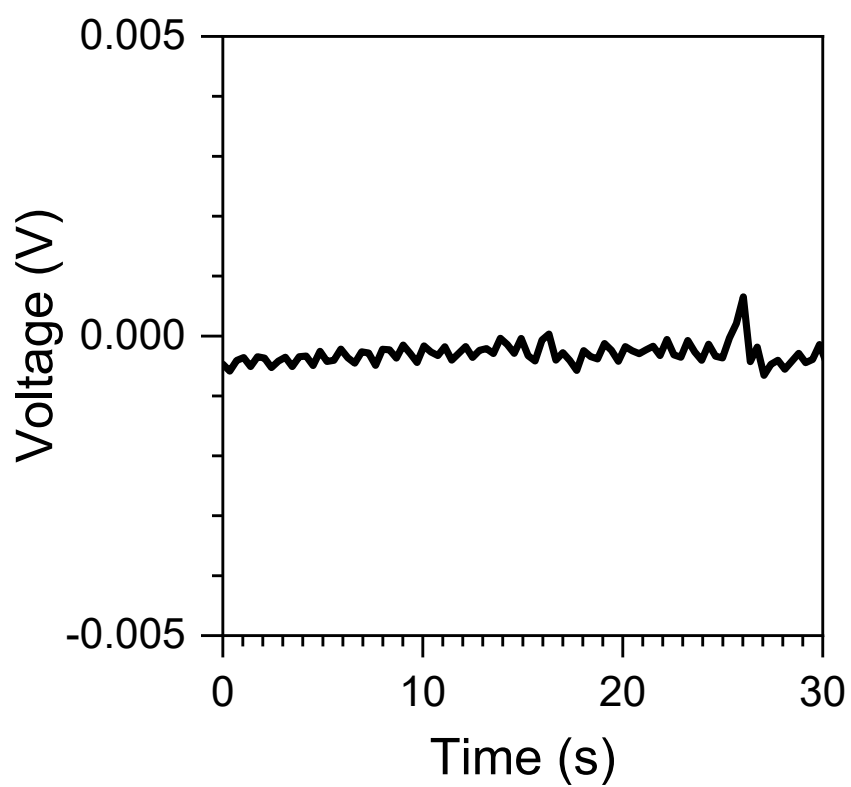

**Fig. S5.** V-t measurement result under 0.4% RH, 20 °C.

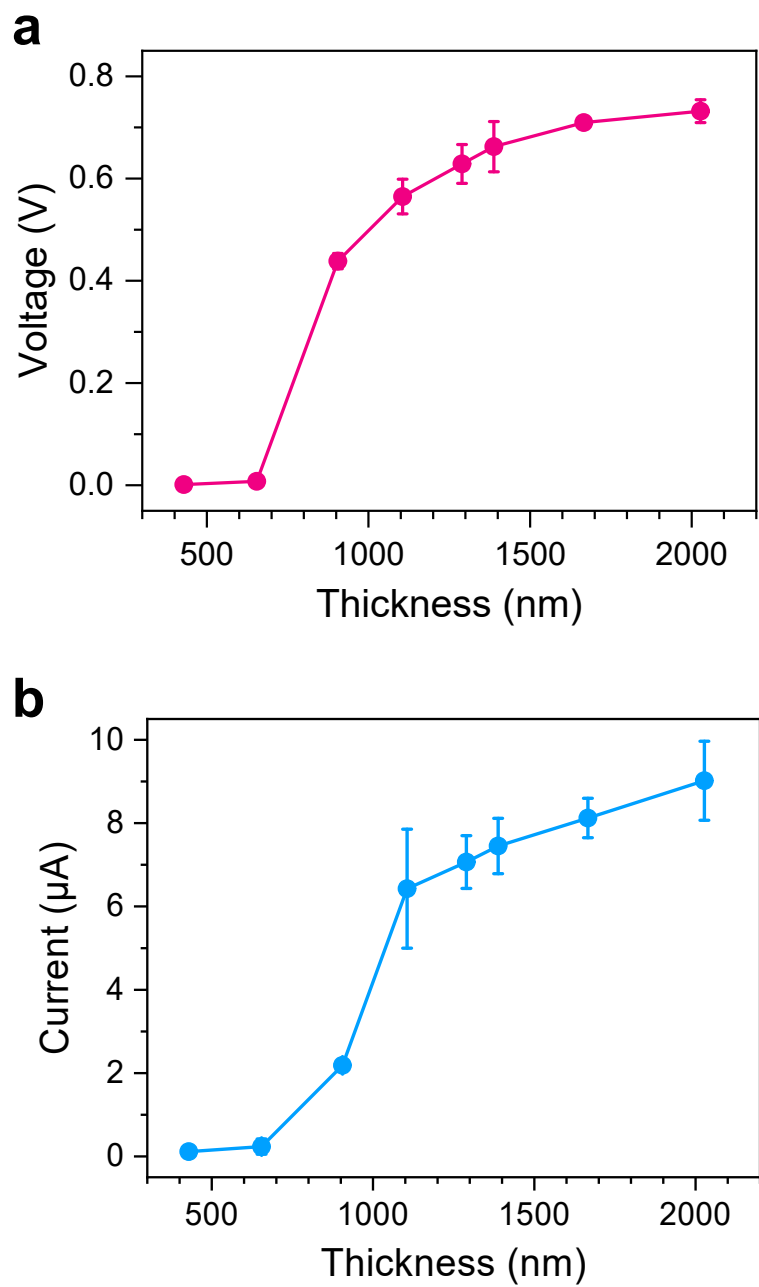

**Fig. S6.** (a) Voltage and (b) current performances from  $V$ - $t$  and  $I$ - $t$  measurements with different perovskite thicknesses. Devices were exposed to 97% RH at 20 °C.

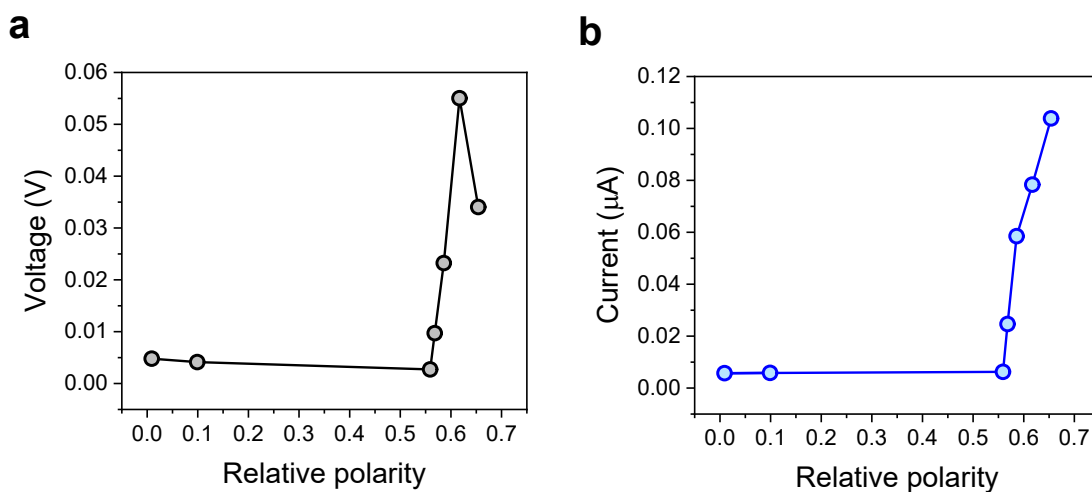

**Fig. S7.** Voltage and current performance obtained from V-t and I-t measurements by exposure to the vapor of alcohols with different alkyl chain lengths (ethanol, 1-propanol, 1-butanol, 1-pentanol and 1-hexanol), toluene and hexane at 20 °C. Relative polarity of solvents is ethanol (0.654), 1-propanol (0.617), 1-butanol (0.586), 1-pentanol (0.568), 1-hexanol (0.559), toluene (0.099) and hexane (0.009).



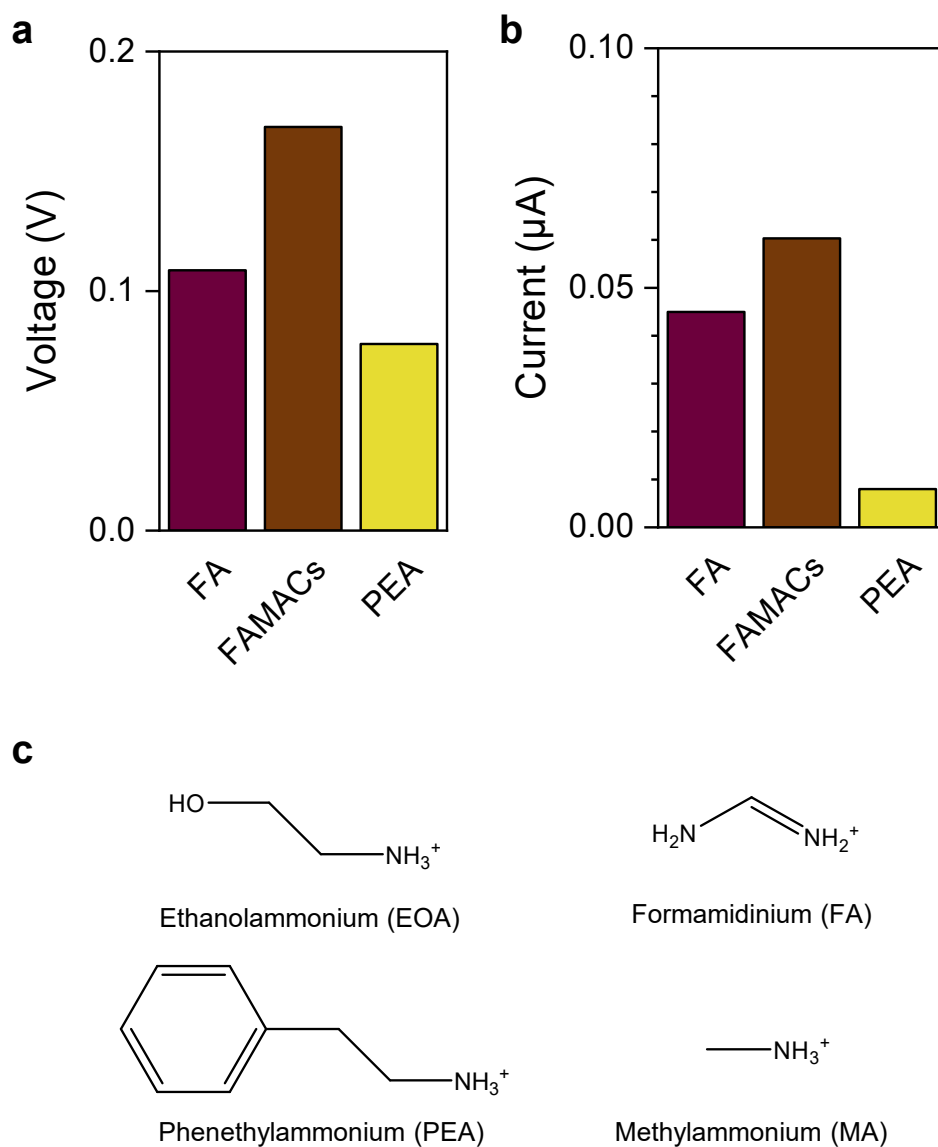

**Fig. S8.** (a) Voltage and (b) current performance from  $V$ - $t$  and  $I$ - $t$  measurements of devices with  $\text{FAPbI}_3$ ,  $\text{FA}_{1-x-y}\text{MA}_x\text{Cs}_y\text{Pb}(\text{I}_{3-z}\text{Br}_z)_3$  (FAMACs) 3D perovskite and  $\text{PEA}_2\text{PbI}_4$  2D perovskite exposed to 97% RH at 20 °C. (c) Illustration of the organic cations. All perovskite films were deposited with the same coating condition as  $\text{EOA}_2\text{PbI}_4$  device.

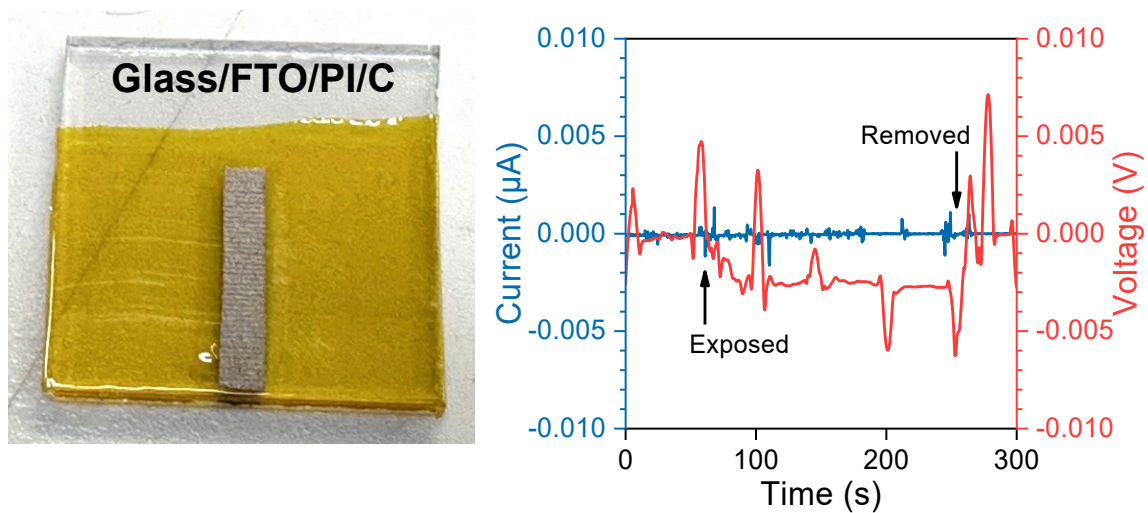

**Fig. S9.** I-t and V-t measurement results of device with a structure of carbon electrode/Poly imide (PI)/etched FTO/Glass under 97% RH at 20 °C.

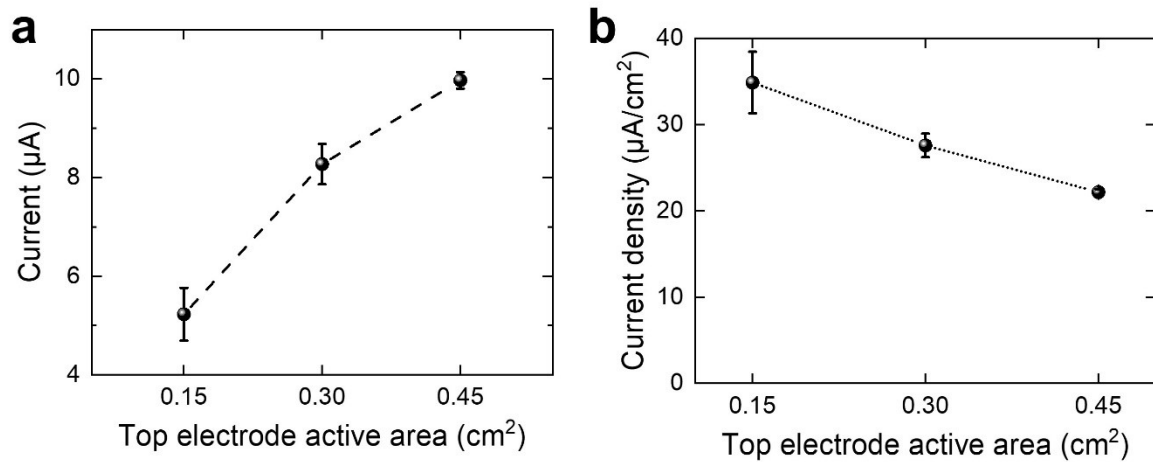

**Fig. S10.** (a) Current and (b) current density values from devices with different active area sizes ( $1.5 \times 10$  mm,  $3 \times 10$  mm and  $4.5 \times 10$  mm) under 97% RH at 20 °C.

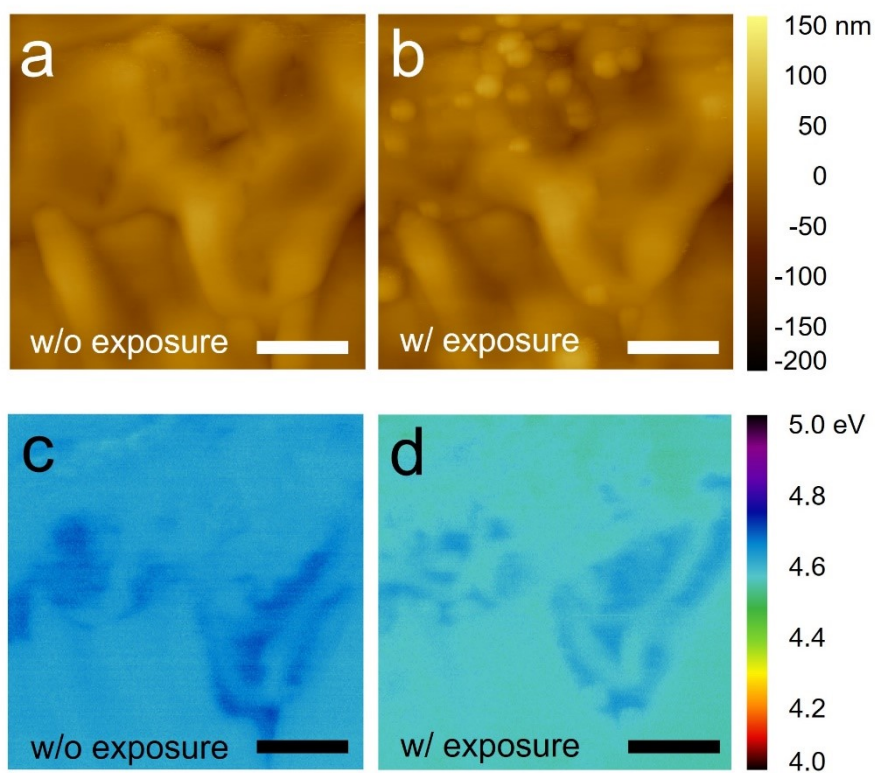

**Figure S11.** AFM topography images of perovskite before (a) and after (b) exposure to humid air (~55% RH, 25°C). KPFM images of perovskite before (c) and after (d) exposure to humid condition (~55% RH, 25°C). Scale bars indicate 500 nm.

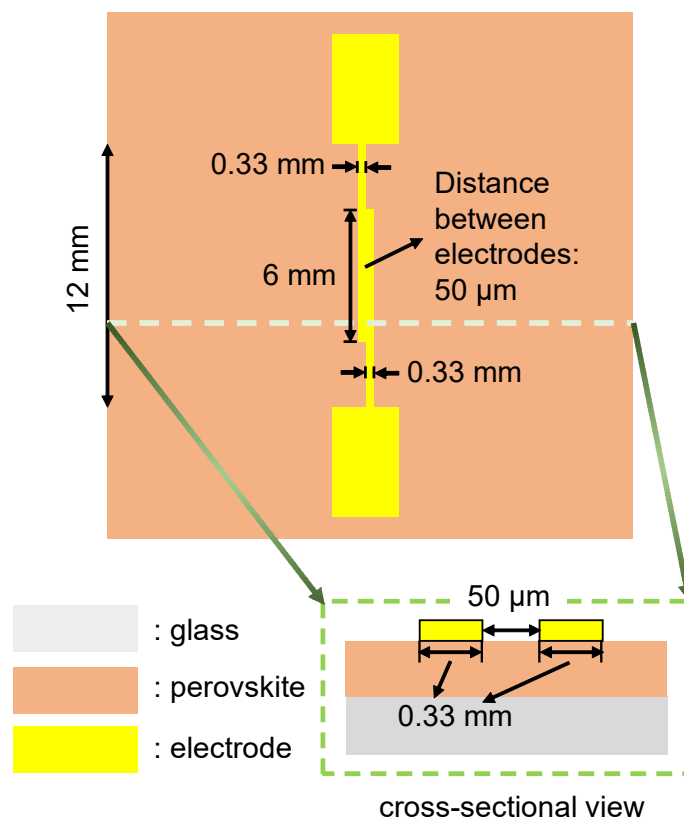

**Fig. S12.** Device structure for measuring surface ionovoltic properties that were presented in Fig. 3(g).

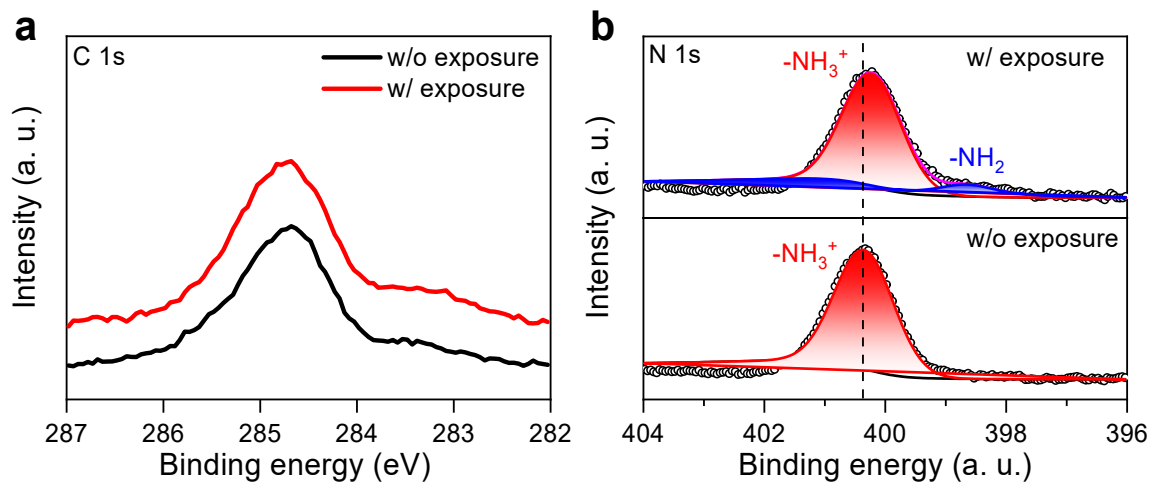

**Fig. S13.** (a) C 1s and (b) N 1s XPS data for perovskite films without and with exposure under 86% RH at 20 °C.

**a**

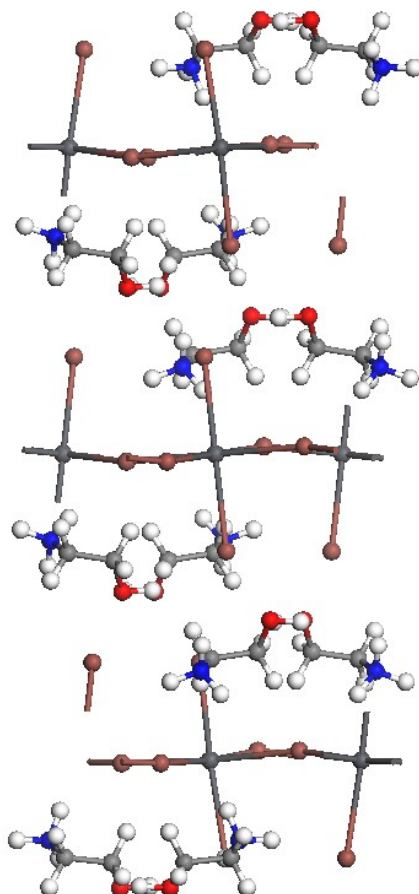

**b**

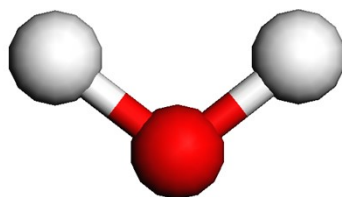

**Fig. S14.** Optimized structure of (a) EOA<sub>2</sub>PbI<sub>4</sub> and (b) H<sub>2</sub>O.

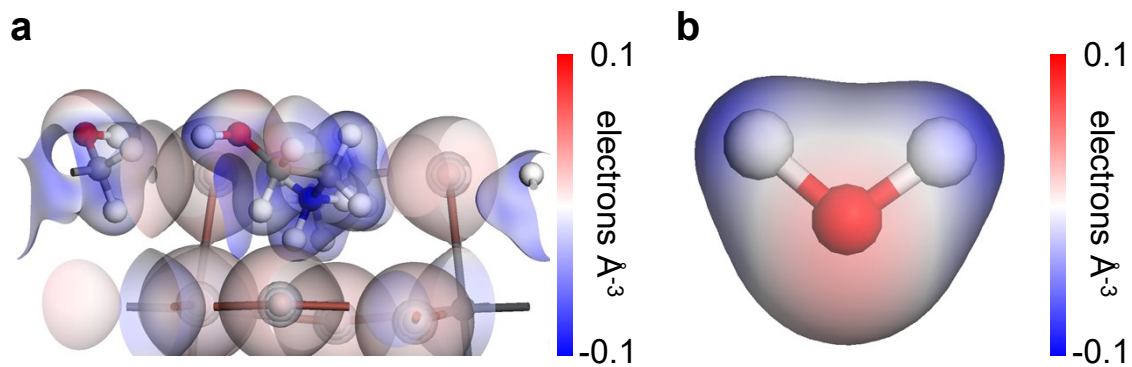

**Fig. S15.** The local potential in (a) EOA<sub>2</sub>PbI<sub>4</sub> and (b) H<sub>2</sub>O analyzed using electron density difference (EDD).



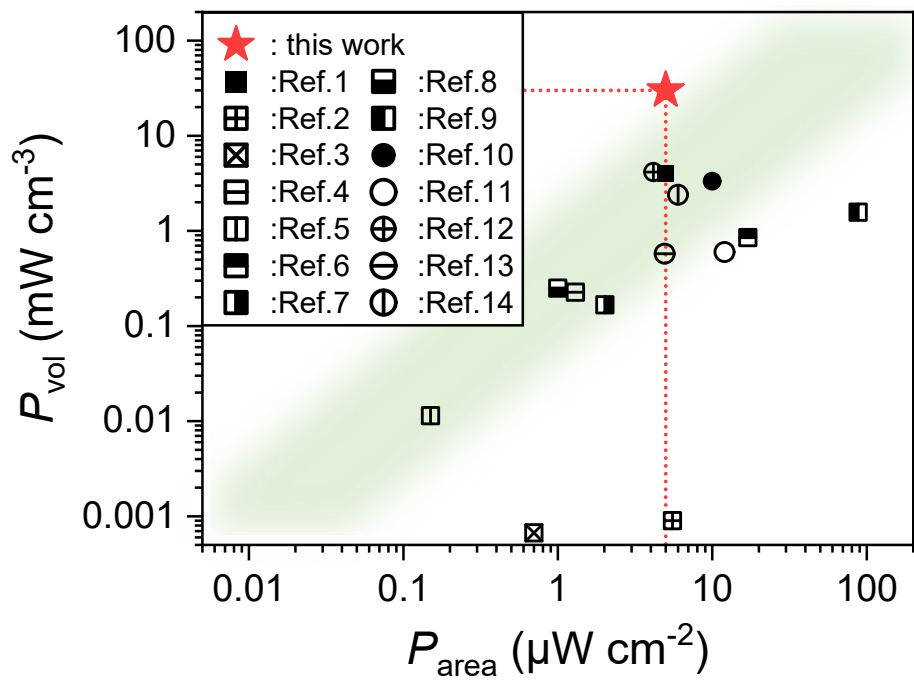

**Fig. S16.** Volumetric ( $P_{\text{vol}}$ ) and areal power densities ( $P_{\text{area}}$ ) of the current perovskite ionovoltaics (star) and the previously reported data published elsewhere [1-14].

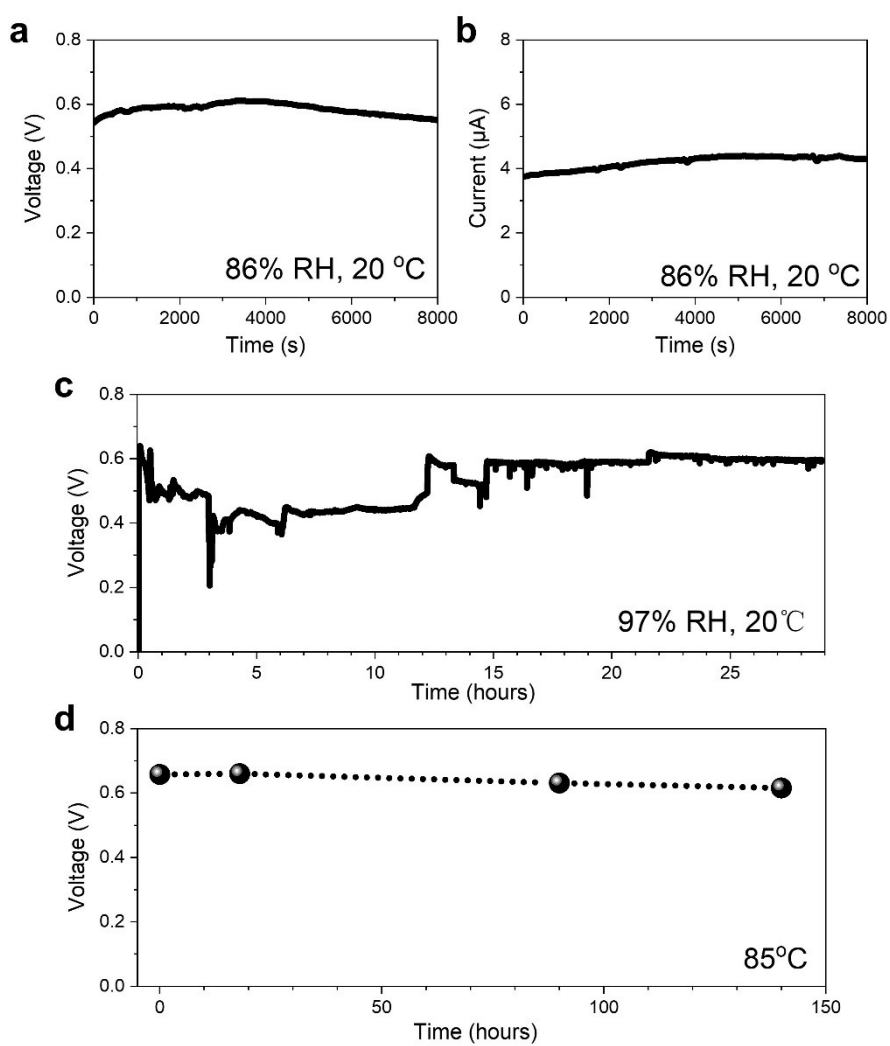

**Fig. S17.** (a)  $V$ - $t$  and (b)  $I$ - $t$  measured for 8000 seconds under 86% RH at 20 °C, (c)  $V$ - $t$  measured for 29 hours under 97% RH at 20 °C, (d) thermal stability of the device stored under 85°C.

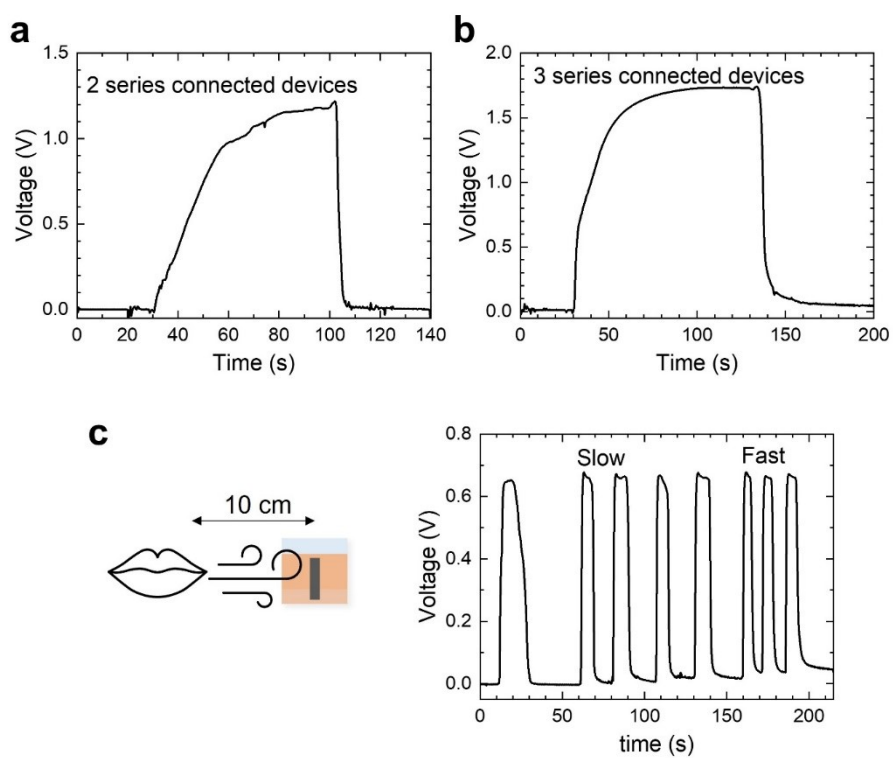

**Fig. S18.** Voltage output of the series connected devices with (a) 2 and (b) 3 devices. (c) Application of ionovoltic devices for respiration sensors.

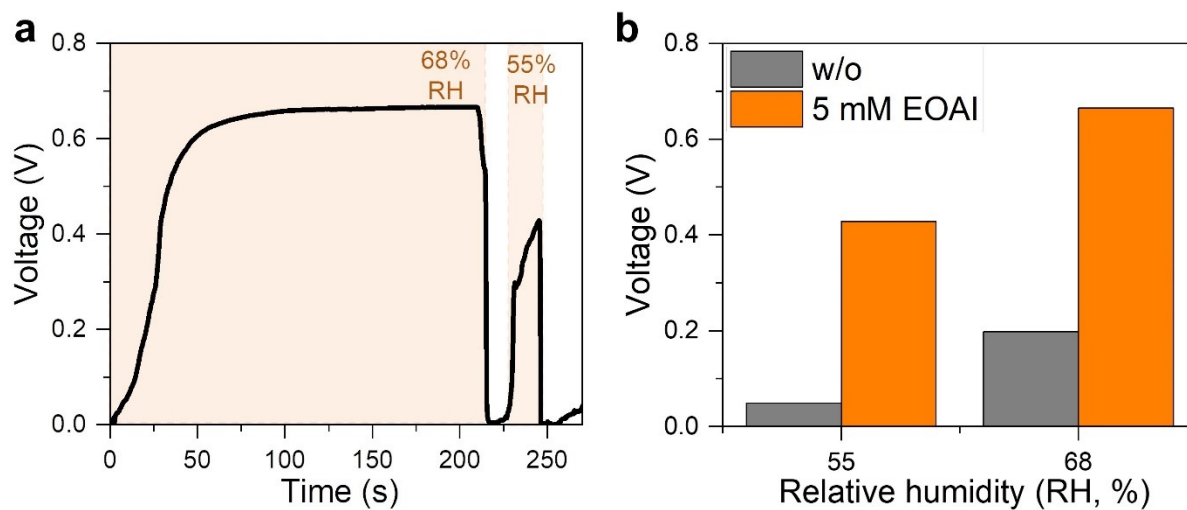

**Fig. S19.** Voltage output of the modified perovskite ionovoltaic device with 5 mM EOAI under 55 and 68% RH.

**Table S1.** Areal and volumetric power densities of ionovoltaics with various active materials.

| Materials                              | RH           | Areal Power density ( $\mu\text{W cm}^{-2}$ ) | Active layer thickness ( $\mu\text{m}$ ) | Voltage performance (V) | Volumetric Power density ( $\text{mW cm}^{-3}$ ) | Ref.             |
|----------------------------------------|--------------|-----------------------------------------------|------------------------------------------|-------------------------|--------------------------------------------------|------------------|
| <b>2D Perovskite</b>                   | <b>97%</b>   | <b>4.99</b>                                   | <b>1.67</b>                              | <b>0.7</b>              | <b>30</b>                                        | <b>this work</b> |
| protein nanowires                      | 50%          | 5                                             | 7                                        | 0.5                     | 4                                                | 1                |
| polyelectrolyte bilayers               | 85%<br>(25%) | 5.52<br>(0.076)                               | 100                                      | 1.38<br>(0.95)          | 0.552*<br>( $9 \times 10^{-4}$ )                 | 2                |
| LiCl + Carbon black + cellulon         | 55~60 %      | 0.7                                           | 2000                                     | 0.78                    | $6.7 \times 10^{-4}$                             | 3                |
| CNT/AAO                                | 93%          | 1.3                                           | 47                                       | 1.1                     | 0.227                                            | 4                |
| electrolyte-loaded nanofiber           | 95%          | 0.15                                          | 132                                      | 0.7                     | 0.0114                                           | 5                |
| PSSA membrane                          | 80%          | 17                                            | 200                                      | 0.8                     | 0.85*                                            | 6                |
| Graphene oxide                         | 85%          | 2.02                                          | 120                                      | 0.45                    | 0.168*                                           | 7                |
| Microbial biofilms                     | 50%          | 1.0                                           | 40                                       | 0.45                    | 0.25*                                            | 8                |
| PSSA/Rose Bengal                       | 50%          | 88                                            | 560                                      | 0.92                    | 1.571*                                           | 9                |
| Silicon Nanowire fibers                | 63%          | 10                                            | 30                                       | 0.55                    | 3.33*                                            | 10               |
| Sodium alginate + $\text{SiO}_2$ + rGO | 100%         | 12                                            | 200                                      | 0.5                     | 0.6*                                             | 11               |
| $\text{TiO}_2$ nanowire                | 85%          | 4.16                                          | 10                                       | 0.5                     | 4.16*                                            | 12               |
| Cellulose membrane                     | 82%          | 4.92                                          | 85                                       | 0.83                    | 0.576*                                           | 13               |

|                           |     |       |    |     |      |    |
|---------------------------|-----|-------|----|-----|------|----|
| silicon nanowire arrays   | 45% | 6     | 25 | 0.4 | 2.4* | 14 |
| Calcinated ZIF-8/GO + ILs | 93% | 109.2 | -  | 0.3 | **   | 15 |

\* Marked power densities were calculated based on the thickness of active layers.

\*\* The calculation was excluded because of the complicated system by the existence of multiple layers that could be involved in power density measurement.

## References

1. X. Liu, H. Gao, J. E. Ward, X. Liu, B. Yin, T. Fu, J. Chen, D. R. Lovley and J. Yao, *Nature*, 2020, **578**, 550-554.
2. H. Wang, Y. Sun, T. He, Y. Huang, H. Cheng, C. Li, D. Xie, P. Yang, Y. Zhang and L. Qu, *Nat. Nanotechnol.*, 2021, **16**, 811–819.
3. J. Tan, S. Fang, Z. Zhang, J. Yin, L. Li, X. Wang and W. Guo, *Nat. Commun.*, 2022, **13**, 3643.
4. Y. Zhang, T. Yang, K. Shang, F. Guo, Y. Shang, S. Chang, L. Cui, X. Lu, Z. Jiang, J. Zhou, C. Fu and Q.-C. He, *Nat Commun.*, 2022, **13**, 3484.
5. Z. Sun, X. Wen, L. Wang, J. Yu and X. Qin, *Energy Environ. Sci.*, 2022, **15**, 4584.
6. T. Xu, X. Ding, Y. Huang, C. Shao, L. Song, X. Gao, Z. Zhanga and L. Qu, *Energy Environ. Sci.*, 2019, **12**, 97.
7. H. Cheng, Y. Huang, F. Zhao, C. Yang, P. Zhang, L. Jiang, G. Shi and L. Qu, *Energy Environ. Sci.*, 2018, **11**, 2839.
8. X. Liu, T. Ueki, H. Gao, T. L. Woodard, K. P. Nevin, T. Fu, S. Fu, L. Sun, D. R. Lovley and J. Yao, *Nat Commun.*, 2022, **13**, 4369.
9. J. Bai, Y. Huang, H. Wang, T. Guang, Q. Liao, H. Cheng, S. Deng, Q. Li, Z. Shuai and L. Qu, *Adv. Mater.*, 2022, **34**, 2103897.
10. B. Shao, Z. Song, X. Chen, Y. Wu, Y. Li, C. Song, F. Yang, T. Song, Y. Wang, S.-T. Lee and B. Sun, *ACS Nano*, 2021, **15**, 7472-7481.
11. H. Wang, T. He, X. Hao, Y. Huang, H. Yao, F. Liu, H. Cheng and L. Qu, *Nature Commun.*, 2022, **13**, 2524.
12. D. Shen, M. Xiao, G. Zou, L. Liu, W. W. Duley and Y. N. Zhou, *Adv. Mater.*, 2018, **30**, 1705925.
13. S. Lee, J. Eun and S. Jeon, *Nano Energy*, 2020, **68**, 104364.
14. Y. Qin, Y. Wang, X. Sun, Y. Li, H. Xu, Y. Tan, Y. Li, T. Song and B. Sun, *Angew. Chem. Int. Ed.*, 2020, **59**, 10619-10625.
15. D. Lv, S. Zheng, C. Cao, K. Li, L. Ai, X. Li, Z. Yang, Z. Xu and X. Yao, *Energy Environ. Sci.*, 2022, **15**, 2601-2609.
